# Supplementary material for: Superior photocatalytic activity of Mn vanadate/reduced graphene oxide magnetic nanocomposite for the oxidation of methylene blue dye under sunlight irradiation
Source: Royal Society of Chemistry journal article supplement (doi:10.1039/d4re00314d), 2025-01-01
Supplement: d4re00314d1.pdf [file d4re00314d1.pdf]

## **Supplementary Materials**

### **Superior photocatalytic activity of Mn vanadate/reduced graphene oxide magnetic nanocomposite for oxidation of methylene blue dye under sunlight irradiation**

*Fatemeh Rahmatpour and Niaz Monadi \**

*Department of Inorganic Chemistry, Faculty of Chemistry, University of Mazandaran, P.O. Box  
47416-95447, Babolsar, Iran.*

Content:

BET and BJH plots

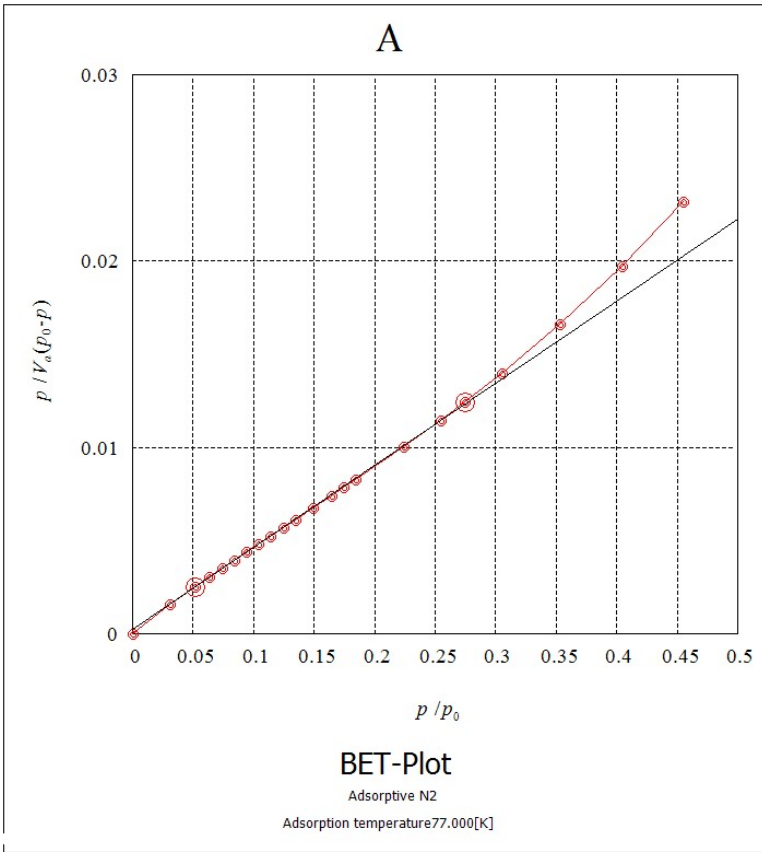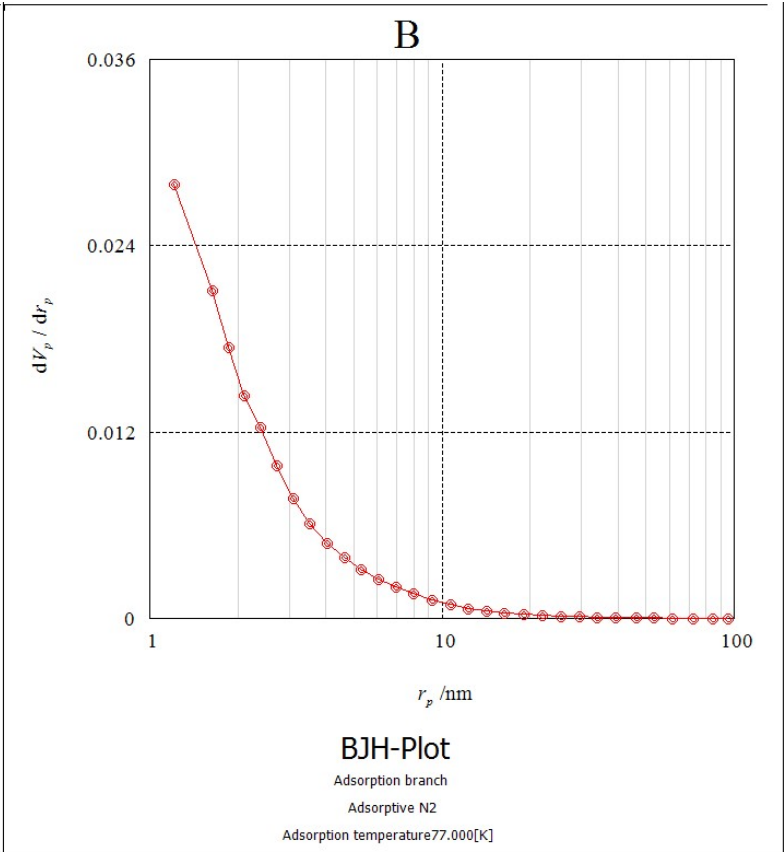

|                    |                                                 |                                    |                                               |
|--------------------|-------------------------------------------------|------------------------------------|-----------------------------------------------|
| $V_m$              | 22.599 [cm <sup>3</sup> (STP) g <sup>-1</sup> ] | $a_{s,BET}$                        | 9.8360E+01 [m <sup>2</sup> g <sup>-1</sup> ]  |
| $C$                | 188.60                                          | Total pore volume( $p/p_0=0.990$ ) | 8.8772E-02 [cm <sup>3</sup> g <sup>-1</sup> ] |
| Mean pore diameter | 3.6101 [nm]                                     |                                    |                                               |

|       |                                               |                    |           |
|-------|-----------------------------------------------|--------------------|-----------|
| $V_p$ | 6.8037E-02 [cm <sup>3</sup> g <sup>-1</sup> ] | $r_{p,peak}(Area)$ | 1.21 [nm] |
| $a_p$ | 58.923 [m <sup>2</sup> g <sup>-1</sup> ]      |                    |           |

Fig S1. A) BET and B) BJH plots of rGO

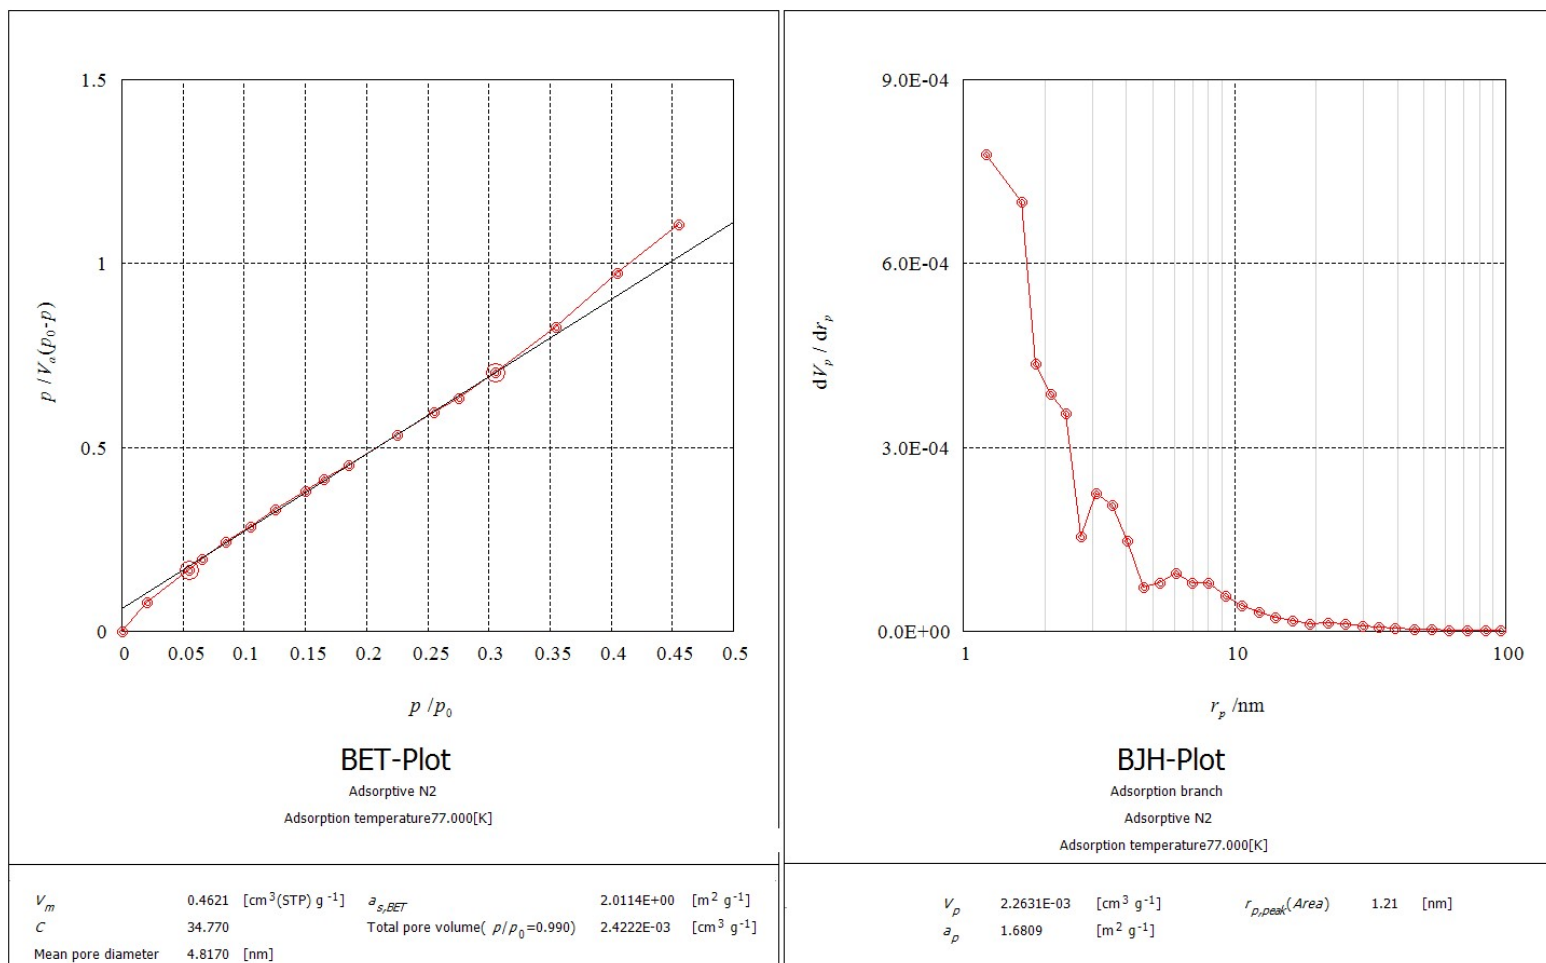

Fig S2. BET and BJH plots of MnV<sub>2</sub>O<sub>6</sub>-2

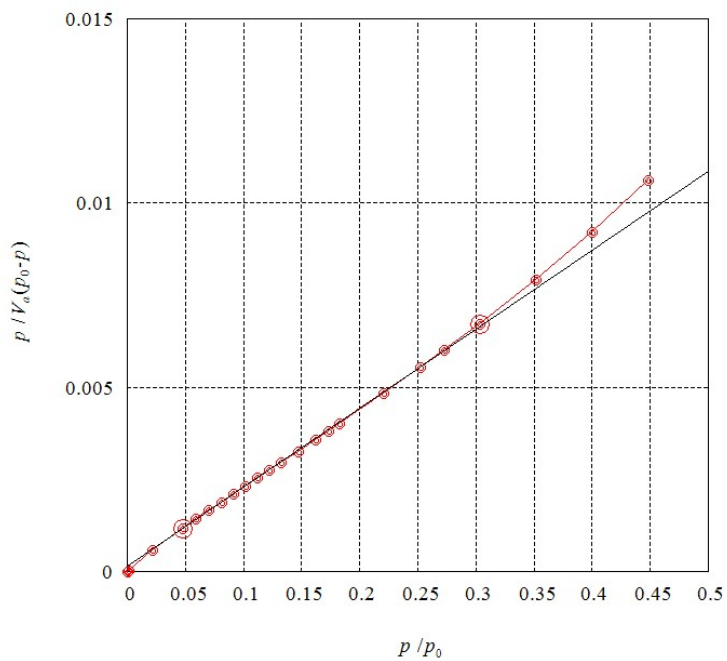

**BET-Plot**

Adsorptive N2  
Adsorption temperature 77.000[K]

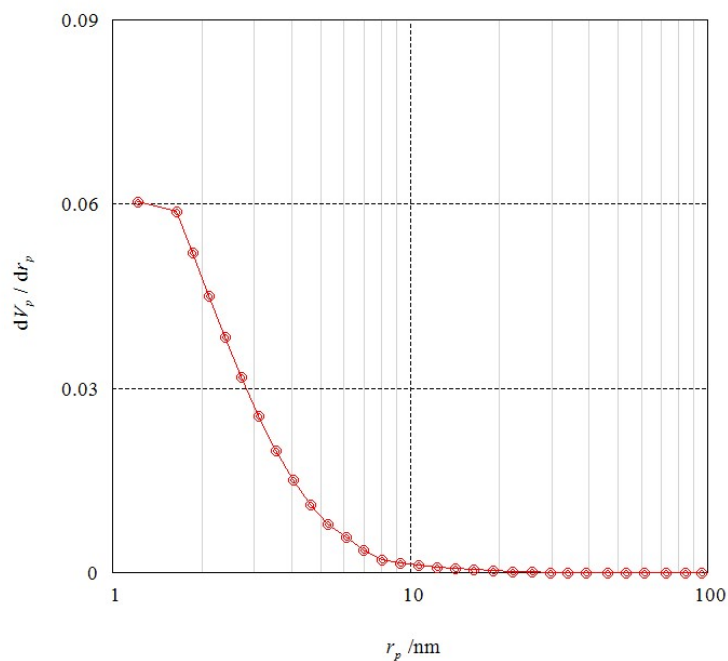

**BJH-Plot**

Adsorption branch  
Adsorptive N2  
Adsorption temperature 77.000[K]

|                    |                                                 |                                    |                                              |
|--------------------|-------------------------------------------------|------------------------------------|----------------------------------------------|
| $V_m$              | 46.296 [cm <sup>3</sup> (STP) g <sup>-1</sup> ] | $a_{s,BET}$                        | 2.0150E+02 [m <sup>2</sup> g <sup>-1</sup> ] |
| $C$                | 146.48                                          | Total pore volume( $p/p_0=0.990$ ) | 0.1926 [cm <sup>3</sup> g <sup>-1</sup> ]    |
| Mean pore diameter | 3.8236 [nm]                                     |                                    |                                              |

|       |                                           |                    |           |
|-------|-------------------------------------------|--------------------|-----------|
| $V_p$ | 0.1603 [cm <sup>3</sup> g <sup>-1</sup> ] | $r_{p,peak}(Area)$ | 1.21 [nm] |
| $a_p$ | 147.64 [m <sup>2</sup> g <sup>-1</sup> ]  |                    |           |

Fig S3. BET and BJH plots of rGO/Fe<sub>3</sub>O<sub>4</sub>/MnV<sub>2</sub>O<sub>6</sub> composite
